# Supplementary material
Source: publisher site journal article supplement (https://zse.pensoft.net/article/49022/download/suppl/36/)
Supplement: Supplementary file 1

**Table S4.** Morphometrics of *Longidorus vineacola* from the rhizosphere of uncultivated plants in agro-forestry systems in Portugal. All measurements in µm and in the format: mean ± s.d. (range)*.

| Character/ Sample code | 119/015 | 129/015 | | M3-OLV |
| --- | --- | --- | --- | --- |
| Locality | Q. da Amoreirinhas da Cima, Montemor-o-Novo | Q. da Amoreirinhas da Cima, Montemor-o-Novo | | Herdade da Mitra, Valverde, Evora |
| Host | cork oak tree | cork oak tree | | wild olive |
| n | 4 females | 1 female | 3 males | 3 females |
| L | 8.3 ±0.9 (6.9-9.1) | 9.6 | 7.3 ±0.8 (6.4-8.2) | 8.0 ±1.5 (7.8-8.1) |
| a | 114.67 ± 18.1 (91.6-135.9) | 161.7 | 107.5 ± 13.6 (96.9-122.9) | 108.7 ± 10.6 (96.9-117.5) |
| b | 18.0 ± 2.8 (14.6-20.7) | 19.4 | 16.9 ± 1.1 (15.9-18.1) | 16.3 ± 1.0(15.5-17.4) |
| c | 185.5 ± 11.3 (172.3-197.5) | 178.2 | 159.6 ± 6.5 (152.2-164.4) | 184.3 ±18.9 (164.3-201.9) |
| c´ | 0.9±0.09 (0.8-0.9) | 1.1 | 0.9 ± 0.1 (0.9-1.0) | 0.9 ± 0.0 (0.9-0.9) |
| V or T | 50.0 ± 1.5 (49.3-52.4) | 55.0 | 62.4± 2.8 (59.7-65.3) | 50.3± 2.9 (47.1-52.9) |
| G1 | 586.3± 4.0 (582.0-590.0) | 535.0 | - | 676.2± 77.9 (607.0-760.6) |
| G2 | 598.0± 75.6 (515.0-663.0) | 515.0 | - | 659.1± 52.2 (611.5-714.9) |
| Odontostyle length | 92.2 ± 5.9 (87.0-99.5) | 99.4 | 97.2 ± 5.0 (91.5-100.9) | 97.3 ± 2.0 (95.0-98.7) |
| Odontophore length | 74.0 ± 3.6 (69.0-77.5) | 60.9 | 70.7 ± 7.4 (62.5-76.9) | 65.7 ± 1.9 (63.7-67.3) |
| Lip region width | 17.9 ± 0.6 (17.1-18.5) | 16.3 | 18.2 ± 2.3 (15.5-19.6) | 18.9 ± 0.2 (18.7-19.0) |
| Oral aperture-guiding ring | 30.8 ± 1.2 (29.0-31.5) | 30.3 | 29.9 ±1.1 (29.0-31.2) | 30.7 ±3.6 (27.1-34.2) |
| Tail length | 44.0 ± 2.8 (40.3-46.8) | 54.3 | 45.9 ±5.3 (40.0-50.0) | 43.9 ±4.4 (40.6-44.9) |
| Spicules | - | - | 75.7 ±5.2 (69.9-79.9) | - |
| Lateral accessory piece | - | - | 19.1± 0.7 (18.6-19.7) | - |
| J | 13.4 ± 4.1 (9.1-18.1) | 16.3 | 16.4 ±1.5 (15.2-18.0) | 13.7 ±1.5(12.8-15.4) |

*Abbreviations are defined in Jairajpuri and Ahmad (1992).

(-) Not obtained or not performed.
